# Supplementary material
Source: PubMed Central journal article supplement (PMC1626213)
Supplement: rsbl20050305s05.pdf [file rsbl20050305s05.pdf]

# ELECTRONIC APPENDIX

This is the Electronic Appendix to the article

Parasites in sexual and asexual mollies (*Poecilia*, Poeciliidae, Teleostei): A case for the Red Queen?

By

Michael Tobler & Ingo Schlupp

*Biol. Lett.* (doi:10.1098/rsbl.2005.0305)

Electronic appendices are refereed with the text; however, no attempt is made to impose a uniform editorial style on the electronic appendices.

Table 3: Prevalence and mean intensity with standard deviation of parasites in four populations of molly females of the sexual *P. latipinna* and the asexual *P. formosa* in Central and South Texas (USA). Prevalences were compared using Fisher's Exact Test, mean intensities with Mann-Whitney *U*-Tests.

| Population      | Parasite                         | Species             | Prevalence | <i>P</i>     | Mean intensity | <i>Z, P</i>   |
|-----------------|----------------------------------|---------------------|------------|--------------|----------------|---------------|
| County Road 101 | <i>Ambiphyra</i> sp.             | <i>P. latipinna</i> | 0/14       | 0.126        | 0              | -             |
|                 |                                  | <i>P. formosa</i>   | 4/20       |              | 3.500 ± 1.291  |               |
|                 | <i>Oodinium</i> sp.              | <i>P. latipinna</i> | 1/14       | 0.627        | 1.000          | -1.342, 0.180 |
|                 |                                  | <i>P. formosa</i>   | 3/20       |              | 5.000 ± 2.646  |               |
|                 | <i>Trichodina</i> sp.            | <i>P. latipinna</i> | 4/14       | 0.171        | 3.000 ± 2.828  | -1.656, 0.098 |
|                 |                                  | <i>P. formosa</i>   | 11/20      |              | 10.82 ± 9.857  |               |
|                 | <i>Dactylogyrus</i> sp.          | <i>P. latipinna</i> | 1/14       | <b>0.050</b> | 1.000          | -1.011, 0.312 |
|                 |                                  | <i>P. formosa</i>   | 8/20       |              | 4.250 ± 3.536  |               |
|                 | <i>Posthodiplostomum minimum</i> | <i>P. latipinna</i> | 0/14       | 1.000        | 0              | -             |
|                 |                                  | <i>P. formosa</i>   | 1/20       |              | 3.000          |               |
|                 | Unidentified trematod cyst       | <i>P. latipinna</i> | 2/14       | 1.000        | 1.500 ± 0.707  | -1.000, 0.317 |
|                 |                                  | <i>P. formosa</i>   | 2/20       |              | 1.000 ± 0.000  |               |
|                 | <i>Uvulifer ambloplitis</i>      | <i>P. latipinna</i> | 2/14       | 0.555        | 1.450 ± 0.688  | -0.707, 0.480 |
|                 |                                  | <i>P. formosa</i>   | 1/20       |              | 1.000          |               |
| Martindale      | <i>Ambiphyra</i> sp.             | <i>P. latipinna</i> | 3/22       | 0.755        | 2.330 ± 1.528  | -0.886, 0.376 |
|                 |                                  | <i>P. formosa</i>   | 12/72      |              | 4.080 ± 2.900  |               |

|              |                                  |                     |       |       |               |                      |
|--------------|----------------------------------|---------------------|-------|-------|---------------|----------------------|
|              | <i>Oodinium</i> sp.              | <i>P. latipinna</i> | 2/22  | 1.000 | 2.500 ± 0.707 | -0.150, 0.881        |
|              |                                  | <i>P. formosa</i>   | 2/72  |       | 3.140 ± 2.193 |                      |
|              | <i>Trichodina</i> sp.            | <i>P. latipinna</i> | 6/22  | 0.144 | 2.330 ± 2.805 | -2.374, <b>0.018</b> |
|              |                                  | <i>P. formosa</i>   | 33/72 |       | 6.700 ± 5.747 |                      |
|              | <i>Dactylogyrus</i> sp.          | <i>P. latipinna</i> | 0/22  | 0.588 | 0             | -                    |
|              |                                  | <i>P. formosa</i>   | 5/72  |       | 4.200 ± 2.168 |                      |
|              | <i>Echinochasmus donaldsoni</i>  | <i>P. latipinna</i> | 1/22  | 0.234 | 12.000        | -                    |
|              |                                  | <i>P. formosa</i>   | 0/72  |       | 0             |                      |
|              | <i>Posthodiplostomum minimum</i> | <i>P. latipinna</i> | 0/22  | 0.588 | 0             | -                    |
|              |                                  | <i>P. formosa</i>   | 5/72  |       | 3.200 ± 2.775 |                      |
|              | Unidentified trematod cyst       | <i>P. latipinna</i> | 3/22  | 1.000 | 10.33 ± 12.74 | -0.236, 0.814        |
|              |                                  | <i>P. formosa</i>   | 11/72 |       | 8.270 ± 6.326 |                      |
|              | <i>Uvulifer ambloplitis</i>      | <i>P. latipinna</i> | 5/22  | 0.765 | 1.600 ± 0.894 | -0.105, 0.916        |
|              |                                  | <i>P. formosa</i>   | 14/72 |       | 1.500 ± 0.650 |                      |
| Lincoln Park | <i>Ambiphyra</i> sp.             | <i>P. latipinna</i> | 2/4   | 1.000 | 5.000 ± 4.243 | -0.886, 0.376        |
|              |                                  | <i>P. formosa</i>   | 2/4   |       | 2.000 ± 0.000 |                      |
|              | <i>Oodinium</i> sp.              | <i>P. latipinna</i> | 0/4   | -     | 0             | -                    |
|              |                                  | <i>P. formosa</i>   | 0/4   |       | 0             |                      |
|              | <i>Trichodina</i> sp.            | <i>P. latipinna</i> | 4/4   | 0.429 | 3.750 ± 3.500 | -2.000, <b>0.046</b> |
|              |                                  | <i>P. formosa</i>   | 2/4   |       | 1.000 ± 0.000 |                      |
|              | <i>Dactylogyrus</i> sp.          | <i>P. latipinna</i> | 0/4   | -     | 0             | -                    |

|         |                                  |                     |      |              |               |                      |
|---------|----------------------------------|---------------------|------|--------------|---------------|----------------------|
|         |                                  | <i>P. formosa</i>   | 0/4  |              | 0             |                      |
|         | <i>Echinochasmus donaldsoni</i>  | <i>P. latipinna</i> | 4/4  | 1.000        | 5.500 ± 1.291 | 0.000, 1.000         |
|         |                                  | <i>P. formosa</i>   | 3/4  |              | 8.330 ± 6.658 |                      |
|         | <i>Posthodiplostomum minimum</i> | <i>P. latipinna</i> | 2/4  | 0.429        | 2.000 ± 0.000 | -                    |
|         |                                  | <i>P. formosa</i>   | 0/4  |              | 0             |                      |
|         | Unidentified trematod cyst       | <i>P. latipinna</i> | 2/4  | 1.000        | 4.000 ± 1.414 | -0.889, 0.374        |
|         |                                  | <i>P. formosa</i>   | 3/4  |              | 3.000 ± 1.000 |                      |
|         | <i>Uvulifer ambloplitis</i>      | <i>P. latipinna</i> | 1/4  | 0.486        | 1.000         | -0.577, 0.564        |
|         |                                  | <i>P. formosa</i>   | 3/4  |              | 1.670 ± 1.155 |                      |
| Weslaco | <i>Ambiphyra</i> sp.             | <i>P. latipinna</i> | 7/11 | <b>0.049</b> | 7.000 ± 8.083 | -1.857, <b>0.063</b> |
|         |                                  | <i>P. formosa</i>   | 3/14 |              | 2.000 ± 1.000 |                      |
|         | <i>Oodinium</i> sp.              | <i>P. latipinna</i> | 0/11 | -            | 0             | -                    |
|         |                                  | <i>P. formosa</i>   | 0/14 |              | 0             |                      |
|         | <i>Trichodina</i> sp.            | <i>P. latipinna</i> | 5/11 | 1.000        | 3.200 ± 2.280 | -0.946, 0.344        |
|         |                                  | <i>P. formosa</i>   | 6/14 |              | 2.330 ± 1.966 |                      |
|         | <i>Dactylogyrus</i> sp.          | <i>P. latipinna</i> | 1/11 | 0.341        | 9.000         | -1.451, 0.147        |
|         |                                  | <i>P. formosa</i>   | 4/14 |              | 2.750 ± 2.872 |                      |
|         | <i>Posthodiplostomum minimum</i> | <i>P. latipinna</i> | 1/11 | 1.000        | 4.000         | -1.000, 0.317        |
|         |                                  | <i>P. formosa</i>   | 1/14 |              | 1.000         |                      |
|         | Unidentified trematod cyst       | <i>P. latipinna</i> | 1/11 | 0.440        | 4.000         | -                    |
|         |                                  | <i>P. formosa</i>   | 0/14 |              | 0             |                      |

|                             |                     |       |              |                   |                      |
|-----------------------------|---------------------|-------|--------------|-------------------|----------------------|
| <i>Uvulifer ambloplitis</i> | <i>P. latipinna</i> | 3/11  | <b>0.047</b> | $1.330 \pm 0.577$ | -1.807, <b>0.071</b> |
|                             | <i>P. formosa</i>   | 10/14 |              | $4.900 \pm 3.929$ |                      |

---
